# Supplementary material
Source: PubMed Central journal article supplement (PMC3793127)

## Supporting information

Legends:

**Table S1** Accession numbers of PdhS kinases in representative *Alphaproteobacteria*.

**Table S2** Transduction of tetR deletion of *divK* in different genetic backgrounds.

**Table S3** Transduction of tetR deletion of *pleC* in different genetic backgrounds.

**Table S4** Strains and Plasmids

**Table S5** Primers used in this work

**Figure S1 *In vitro* phosphorylation assay using the HK domain of DivJ(H249A).** DivJ(H249A) was incubated with ATP as described in the text and then loaded on a Phos-Tag SDS-PAGE gel. No detectable DivJ(H249A)-P is produced over time. For positive phosphorylation using wild type DivJ refers to figure 3.

**Figure S2 Alignment of DivJs and PleCs in *Alphaproteobacteria* using ClustalW.** Accession numbers of orthologs of DivJ and PleC are in the bottom table. The consensus sequence of HELIX 1 is shown in figure 6A.

**Figure S3 Lac assay with promoters fused with  $\beta$ -galactosidase in wild type and  $\Delta divJ$  cells.** Asterisks represent significant differences in comparison with wild type cells.

**Figure S4 Overexpression of *divK* and *divK(D53A)*.** A. Morphology of cells; B. Immunoblots using antibodies against DivK.

**Figure S5 Comparison between DivJ and PleC kinase domains in a phosphorylation assay.** Purified DivJ histidine kinase domain is able to auto-phosphorylate a histidine residue using ATP (not GTP) as the phosphate source. DivJ in presence of ATP gives two distinct bands in a SDS-PAGE Phos-tag<sup>TM</sup> gel. PleC preparation is not able to autophosphorylate using ATP or GTP. The gel was stained with Coomassie blue.

**Figure S6** Immunoblot using antibodies against CtrA on normal culture cells and bacteroids isolated from mature nodules of alfalfa (see Experimental Procedures).

**Figure S7 CFU growth curve in logarithmic scale corresponding to curve in figure 1B.** Colony Forming Units (CFU) of wild type,  $\Delta divJ$  (BM253),  $\Delta divJ + divJ$  (BM224).

| Table S1       |                                         |                                             |                            |
|----------------|-----------------------------------------|---------------------------------------------|----------------------------|
| Accession      | Organism                                | score_helix_1/(average_distance*score_DivK) | # of PdhS with score <=0.3 |
| NP_354006.1    | Agrobacterium tumefaciens str. C58      | 0.088498585                                 | 4                          |
| NP_354868.1    | Agrobacterium tumefaciens str. C58      | 0.126829268                                 |                            |
| NP_353940.1    | Agrobacterium tumefaciens str. C58      | 0.153000013                                 |                            |
| NP_353640.1    | Agrobacterium tumefaciens str. C58      | 0.201896873                                 |                            |
| YP_988756.1    | Bartonella bacilliformis KC583          | 0.140709214                                 | 1                          |
| YP_033319.1    | Bartonella henselae str. Houston-1      | 0.104583799                                 | 1                          |
| YP_032083.1    | Bartonella quintana str. Toulouse       | 0.102990267                                 | 1                          |
| NP_769780.1    | Bradyrhizobium japonicum USDA 110       | 0.10104476                                  | 4                          |
| NP_769711.1    | Bradyrhizobium japonicum USDA 110       | 0.127952112                                 |                            |
| NP_770378.1    | Bradyrhizobium japonicum USDA 110       | 0.181887699                                 |                            |
| NP_768927.1    | Bradyrhizobium japonicum USDA 110       | 0.249975805                                 |                            |
| YP_001239118.1 | Bradyrhizobium sp. BTAi1                | 0.115492053                                 | 3                          |
| YP_001239071.1 | Bradyrhizobium sp. BTAi1                | 0.146246595                                 |                            |
| YP_001239459.1 | Bradyrhizobium sp. BTAi1                | 0.207893847                                 |                            |
| YP_001206887.1 | Bradyrhizobium sp. ORS278               | 0.115492053                                 | 3                          |
| YP_001204758.1 | Bradyrhizobium sp. ORS278               | 0.146246595                                 |                            |
| YP_001206686.1 | Bradyrhizobium sp. ORS278               | 0.207893847                                 |                            |
| YP_221371.1    | Brucella abortus biovar 1 str. 9-941    | 0.091076438                                 | 3                          |
| YP_221337.1    | Brucella abortus biovar 1 str. 9-941    | 0.202902343                                 |                            |
| YP_222279.1    | Brucella abortus biovar 1 str. 9-941    | 0.254688924                                 |                            |
| NP_540242.1    | Brucella melitensis 16M                 | 0.087309376                                 | 3                          |
| NP_540274.1    | Brucella melitensis 16M                 | 0.19450999                                  |                            |
| NP_539334.1    | Brucella melitensis 16M                 | 0.244154598                                 |                            |
| YP_414082.1    | Brucella melitensis biovar Abortus 2308 | 0.091156664                                 | 3                          |
| YP_414047.1    | Brucella melitensis biovar Abortus 2308 | 0.203081073                                 |                            |
| YP_414983.1    | Brucella melitensis biovar Abortus 2308 | 0.254913271                                 |                            |
| YP_001258609.1 | Brucella ovis ATCC 25840                | 0.08522413                                  | 3                          |
| YP_001258574.1 | Brucella ovis ATCC 25840                | 0.189864425                                 |                            |
| YP_001259471.1 | Brucella ovis ATCC 25840                | 0.238323351                                 |                            |
| NP_697630.1    | Brucella suis 1330                      | 0.078442544                                 | 3                          |
| NP_697593.1    | Brucella suis 1330                      | 0.174756241                                 |                            |
| NP_698596.1    | Brucella suis 1330                      | 0.219359118                                 |                            |
| NP_421285.1    | Caulobacter crescentus CB15             | 0.131354472                                 | 4                          |
| NP_419879.1    | Caulobacter crescentus CB15             | 0.142003722                                 |                            |
| NP_419469.1    | Caulobacter crescentus CB15             | 0.278908373                                 |                            |
| NP_419878.1    | Caulobacter crescentus CB15             | 0.287512895                                 |                            |
| YP_761588.1    | Hyphomonas neptunium ATCC 15444         | 0.12771933                                  | 1                          |
| YP_420030.1    | Magnetospirillum magneticum AMB-1       | 0.088498585                                 | 12                         |
| YP_421331.1    | Magnetospirillum magneticum AMB-1       | 0.088498585                                 |                            |
| YP_422459.1    | Magnetospirillum magneticum AMB-1       | 0.120234513                                 |                            |
| YP_422213.1    | Magnetospirillum magneticum AMB-1       | 0.122575438                                 |                            |
| YP_421909.1    | Magnetospirillum magneticum AMB-1       | 0.140878115                                 |                            |
| YP_421376.1    | Magnetospirillum magneticum AMB-1       | 0.152545194                                 |                            |

|                |                                         |             |    |
|----------------|-----------------------------------------|-------------|----|
| YP_420475.1    | Magnetospirillum magneticum AMB-1       | 0.153492905 |    |
| YP_422411.1    | Magnetospirillum magneticum AMB-1       | 0.164444529 |    |
| YP_419930.1    | Magnetospirillum magneticum AMB-1       | 0.213403284 |    |
| YP_421236.1    | Magnetospirillum magneticum AMB-1       | 0.273527398 |    |
| YP_423509.1    | Magnetospirillum magneticum AMB-1       | 0.284382449 |    |
| YP_421204.1    | Magnetospirillum magneticum AMB-1       | 0.284382449 |    |
| YP_756181.1    | Maricaulis maris MCS10                  | 0.13444302  | 2  |
| YP_756130.1    | Maricaulis maris MCS10                  | 0.162056922 |    |
| NP_107962.1    | Mesorhizobium loti MAFF303099           | 0.082212876 | 5  |
| NP_102338.1    | Mesorhizobium loti MAFF303099           | 0.132925302 |    |
| NP_107924.1    | Mesorhizobium loti MAFF303099           | 0.135740861 |    |
| NP_107026.1    | Mesorhizobium loti MAFF303099           | 0.229902589 |    |
| NP_103743.1    | Mesorhizobium loti MAFF303099           | 0.257759282 |    |
| YP_673467.1    | Mesorhizobium sp. BNC1                  | 0.082212876 | 3  |
| YP_674114.1    | Mesorhizobium sp. BNC1                  | 0.132925302 |    |
| YP_672741.1    | Mesorhizobium sp. BNC1                  | 0.211601023 |    |
| YP_576731.1    | Nitrobacter hamburgensis X14            | 0.104478005 | 3  |
| YP_577865.1    | Nitrobacter hamburgensis X14            | 0.1322996   |    |
| YP_576751.1    | Nitrobacter hamburgensis X14            | 0.188067783 |    |
| YP_317814.1    | Nitrobacter winogradskyi Nb-255]        | 0.088498585 | 3  |
| YP_318827.1    | Nitrobacter winogradskyi Nb-255]        | 0.112064998 |    |
| YP_317826.1    | Nitrobacter winogradskyi Nb-255]        | 0.159303699 |    |
| YP_001371204.1 | Ochrobactrum anthropi ATCC 49188        | 0.090217639 | 3  |
| YP_001371224.1 | Ochrobactrum anthropi ATCC 49188        | 0.197751728 |    |
| YP_001372457.1 | Ochrobactrum anthropi ATCC 49188        | 0.252287352 |    |
| YP_001412216.1 | Parvibaculum lavamentivorans DS-1       | 0.101618194 | 12 |
| YP_001411928.1 | Parvibaculum lavamentivorans DS-1       | 0.101618194 |    |
| YP_001412341.1 | Parvibaculum lavamentivorans DS-1       | 0.101618194 |    |
| YP_001412704.1 | Parvibaculum lavamentivorans DS-1       | 0.101618194 |    |
| YP_001412976.1 | Parvibaculum lavamentivorans DS-1       | 0.101618194 |    |
| YP_001414513.1 | Parvibaculum lavamentivorans DS-1       | 0.101618194 |    |
| YP_001412635.1 | Parvibaculum lavamentivorans DS-1       | 0.101618194 |    |
| YP_001412236.1 | Parvibaculum lavamentivorans DS-1       | 0.101618194 |    |
| YP_001414415.1 | Parvibaculum lavamentivorans DS-1       | 0.114645267 |    |
| YP_001414737.1 | Parvibaculum lavamentivorans DS-1       | 0.128678247 |    |
| YP_001413207.1 | Parvibaculum lavamentivorans DS-1       | 0.14170532  |    |
| YP_001412397.1 | Parvibaculum lavamentivorans DS-1       | 0.169892849 |    |
| YP_468829.1    | Rhizobium etli CFN 42                   | 0.088498585 | 4  |
| YP_468784.1    | Rhizobium etli CFN 42                   | 0.119314813 |    |
| YP_469945.1    | Rhizobium etli CFN 42                   | 0.126829268 |    |
| YP_468263.1    | Rhizobium etli CFN 42                   | 0.201896873 |    |
| YP_767049.1    | Rhizobium leguminosarum bv. viciae 3841 | 0.092434277 | 5  |
| YP_766988.1    | Rhizobium leguminosarum bv. viciae 3841 | 0.124620958 |    |
| YP_768363.1    | Rhizobium leguminosarum bv. viciae 3841 | 0.132469594 |    |
| YP_766379.1    | Rhizobium leguminosarum bv. viciae 3841 | 0.210875591 |    |

|                |                                         |             |   |
|----------------|-----------------------------------------|-------------|---|
| YP_765221.1    | Rhizobium leguminosarum bv. viciae 3841 | 0.273182044 |   |
| YP_780875.1    | Rhodopseudomonas palustris BisA53       | 0.093966077 | 3 |
| YP_780800.1    | Rhodopseudomonas palustris BisA53       | 0.134252608 |   |
| YP_780902.1    | Rhodopseudomonas palustris BisA53       | 0.16914557  |   |
| YP_531725.1    | Rhodopseudomonas palustris BisB18       | 0.093966077 | 3 |
| YP_531657.1    | Rhodopseudomonas palustris BisB18       | 0.118988436 |   |
| YP_531937.1    | Rhodopseudomonas palustris BisB18       | 0.16914557  |   |
| YP_569154.1    | Rhodopseudomonas palustris BisB5        | 0.093966077 | 3 |
| YP_569080.1    | Rhodopseudomonas palustris BisB5        | 0.118988436 |   |
| YP_569182.1    | Rhodopseudomonas palustris BisB5        | 0.16914557  |   |
| NP_947283.1    | Rhodopseudomonas palustris CGA009       | 0.106012176 | 3 |
| NP_947203.1    | Rhodopseudomonas palustris CGA009       | 0.134242309 |   |
| NP_947317.1    | Rhodopseudomonas palustris CGA009       | 0.1908294   |   |
| YP_487043.1    | Rhodopseudomonas palustris HaA2         | 0.093966077 | 3 |
| YP_487121.1    | Rhodopseudomonas palustris HaA2         | 0.159339831 |   |
| YP_487002.1    | Rhodopseudomonas palustris HaA2         | 0.16914557  |   |
| YP_425158.1    | Rhodospirillum rubrum ATCC 11170        | 0.103610047 | 3 |
| YP_425419.1    | Rhodospirillum rubrum ATCC 11170        | 0.103610047 |   |
| YP_428295.1    | Rhodospirillum rubrum ATCC 11170        | 0.160718158 |   |
| YP_001326332.1 | Sinorhizobium medicae WSM419            | 0.100850407 | 4 |
| YP_001326308.1 | Sinorhizobium medicae WSM419            | 0.135967682 |   |
| YP_001327276.1 | Sinorhizobium medicae WSM419            | 0.144530935 |   |
| YP_001326011.1 | Sinorhizobium medicae WSM419            | 0.230075789 |   |
| NP_385131.1    | Sinorhizobium meliloti 1021             | 0.104235039 | 5 |
| NP_385108.1    | Sinorhizobium meliloti 1021             | 0.140530883 |   |
| NP_385988.1    | Sinorhizobium meliloti 1021             | 0.149381527 |   |
| NP_436882.1    | Sinorhizobium meliloti 1021             | 0.205390222 |   |
| NP_384827.1    | Sinorhizobium meliloti 1021             | 0.237797345 |   |
| YP_616172.1    | Sphingopyxis alaskensis RB2256          | 0.242958911 | 2 |
| YP_615219.1    | Sphingopyxis alaskensis RB2256          | 0.2964993   |   |
| YP_001416529.1 | Xanthobacter autotrophicus Py2          | 0.098100623 | 2 |
| YP_001416311.1 | Xanthobacter autotrophicus Py2          | 0.133279878 |   |

Table S2

| Recipient strain            | Number of transduced colonies (cfu/ml) |
|-----------------------------|----------------------------------------|
| Rm1021 + pMR10              | 0                                      |
| Rm1021 + pMR10- <i>divK</i> | 87                                     |

Table S3

| <b>Recipient strain</b>               | <b>Number of transduced colonies<br/>(cfu/ml)</b> |
|---------------------------------------|---------------------------------------------------|
| <b>Wild type</b>                      | 0                                                 |
| <b><i>cbrA::Tn5</i></b>               | 51                                                |
| <b><math>\Delta</math><i>divJ</i></b> | 0                                                 |
| <b>1021 + pMR10 <i>pleC</i></b>       | 122                                               |

Table S4

| Organism or plasmid           | Strain or plasmid name                                                                          | Description                                                                                                                                                                                                                                                                                                                                                                                        | Resistance                                                                                                                                                  | Source                                                                                                                                                             |                                     |                               |
|-------------------------------|-------------------------------------------------------------------------------------------------|----------------------------------------------------------------------------------------------------------------------------------------------------------------------------------------------------------------------------------------------------------------------------------------------------------------------------------------------------------------------------------------------------|-------------------------------------------------------------------------------------------------------------------------------------------------------------|--------------------------------------------------------------------------------------------------------------------------------------------------------------------|-------------------------------------|-------------------------------|
| Strains<br><i>S. meliloti</i> | Rm1021                                                                                          | SU47 <i>str-21</i>                                                                                                                                                                                                                                                                                                                                                                                 | Sm                                                                                                                                                          | (Galibert, <i>et al.</i> , 2001)                                                                                                                                   |                                     |                               |
|                               | Rm1021G<br>KEG2016                                                                              | Rm1021 + pGECE<br><i>cbrA::Tn5</i>                                                                                                                                                                                                                                                                                                                                                                 | Sm, Km                                                                                                                                                      | This work<br>(Gibson, <i>et al.</i> , 2006)                                                                                                                        |                                     |                               |
|                               | BM224<br>BM253                                                                                  | Rm1021 $\Delta$ <i>divJ</i> ::tc + pMR10 <i>divJ</i><br>Rm1021 $\Delta$ <i>divJ</i> ::tc pMR10 (deletion<br>transduced from BM224)                                                                                                                                                                                                                                                                 | Sm, Km, Tc<br>Sm, Km, Tc                                                                                                                                    | This work<br>This work                                                                                                                                             |                                     |                               |
|                               | BM253G<br>BM317<br>EB775                                                                        | BM253 + pGECE<br>Rm1021 + pSRKKm <i>divJ</i> ( <i>S.mel</i> )<br>Rm1021 + pSRKKm <i>divJ</i> H249A<br>( <i>S.meliloti</i> )                                                                                                                                                                                                                                                                        | Sm, Km<br>Sm, Km                                                                                                                                            | This work<br>This work<br>This work                                                                                                                                |                                     |                               |
|                               | BM240<br>BM264                                                                                  | Rm1021 + pSRKKm <i>ctrA</i> ( <i>S.mel</i> )<br>Rm1021 $\Delta$ <i>divJ</i> ::tc+ pSRKKm <i>ctrA</i><br>( <i>S.meliloti</i> )                                                                                                                                                                                                                                                                      | Sm, Km<br>Sm, Km, Tc                                                                                                                                        | This work<br>This work                                                                                                                                             |                                     |                               |
|                               | EB594<br>EB638<br>EB593<br>EB602                                                                | Rm1021 + pJS70<br>Rm1021 $\Delta$ <i>divJ</i> ::tc + pJS70<br>Rm1021 <i>cbrA</i> ::tn5 + pJS70<br>Rm1021 $\Delta$ <i>divJ</i> ::tc + <i>cbrA</i> ::tn5 + pSRK Gm<br><i>divJ</i>                                                                                                                                                                                                                    | Sm, Tc<br>Sm, Tc<br>Sm, Km, Tc<br>Sm, Km, Tc,<br>Gm                                                                                                         | This work<br>This work<br>This work<br>This work                                                                                                                   |                                     |                               |
|                               | EB601                                                                                           | Rm1021 $\Delta$ <i>pleC</i> + pSRKKm <i>pleC</i>                                                                                                                                                                                                                                                                                                                                                   | Sm, Km, Tc                                                                                                                                                  | This work                                                                                                                                                          |                                     |                               |
|                               | EB630<br>EB704<br>EB705<br>EB710<br>EB775<br>EB841<br>EB864<br>EB865<br>EB866<br>EB868<br>EB825 | Rm1021 $\Delta$ <i>pleC</i> + <i>cbrA</i> ::tn5<br>Rm1021 + pMR10 <i>divK</i><br>Rm1021 + pSRK Km <i>divK</i><br>1021 $\Delta$ <i>divK</i> + pMR10 <i>divK</i><br>Rm1021 + pSRKKm <i>divJ</i> H249A<br>Rm1021 + pSRK Km <i>divK</i> D53A<br>Rm1021 + pFP01<br>Rm1021 + pFP02<br>Rm1021 $\Delta$ <i>divJ</i> + pFP01<br>Rm1021 $\Delta$ <i>divJ</i> + pFP02<br>Rm1021 <i>pdhA</i> plasmid insertion | Sm, Km, Tc<br>Sm, Km<br>Sm, Km<br>Sm, Km, Tc<br>Sm, Km<br>Sm, Km<br>Sm, Tc<br>Sm, Tc<br>Sm, Tc<br>Sm, Tc<br>Sm, Km                                          | This work<br>This work<br>This work<br>This work<br>This work<br>This work<br>This work<br>This work<br>This work<br>This work<br>(Pobigaylo <i>et al.</i> , 2006) |                                     |                               |
|                               | EB826                                                                                           | Rm 2011 <i>pdhB</i> ::Tn5_1                                                                                                                                                                                                                                                                                                                                                                        | Sm, Km                                                                                                                                                      | (Pobigaylo <i>et al.</i> , 2006)                                                                                                                                   |                                     |                               |
|                               | EB826                                                                                           | Rm 2011 <i>pdhB</i> ::Tn5_2                                                                                                                                                                                                                                                                                                                                                                        | Sm, Km                                                                                                                                                      | (Pobigaylo <i>et al.</i> , 2006)                                                                                                                                   |                                     |                               |
|                               | EB827                                                                                           | Rm 2011 <i>pdhB</i> ::Tn5_3                                                                                                                                                                                                                                                                                                                                                                        | Sm, Km                                                                                                                                                      | (Pobigaylo <i>et al.</i> , 2006)                                                                                                                                   |                                     |                               |
|                               | EB827                                                                                           | Rm 2011 <i>pdhB</i> ::Tn5_4                                                                                                                                                                                                                                                                                                                                                                        | Sm, Km                                                                                                                                                      | (Pobigaylo <i>et al.</i> , 2006)                                                                                                                                   |                                     |                               |
|                               | <i>C. crescentus</i>                                                                            | BM328<br>BM330<br>BM331                                                                                                                                                                                                                                                                                                                                                                            | CB15 + pSRKKm<br>CB15 + pSRKKm <i>divJ</i> ( <i>S.mel</i> )<br>CB15 $\Delta$ <i>divJ</i> -tet from (Skerker <i>et al</i> 2005)<br>+ pSRKKm ( <i>S.mel</i> ) | Km, Tc<br>Km, Tc<br>Km, Tc                                                                                                                                         | This work<br>This work<br>This work |                               |
|                               |                                                                                                 | BM333                                                                                                                                                                                                                                                                                                                                                                                              | CB15 $\Delta$ <i>divJ</i> -tet from (Skerker <i>et al</i> 2005)<br>+ pSRKKm <i>divJ</i> ( <i>S.mel</i> )                                                    | Km, Tc                                                                                                                                                             | This work                           |                               |
|                               |                                                                                                 | <i>E. coli</i>                                                                                                                                                                                                                                                                                                                                                                                     | S17-1                                                                                                                                                       | <i>recA</i> , <i>pro</i> , <i>hsdR</i> , <i>RP4-2-Tc::Mu-km::Tn7</i>                                                                                               | -                                   | (Simon, <i>et al.</i> , 1983) |
|                               |                                                                                                 |                                                                                                                                                                                                                                                                                                                                                                                                    | Bacteriophage                                                                                                                                               | $\Phi$ M12                                                                                                                                                         | Transducing phage                   | (Finan, <i>et al.</i> , 1984) |
|                               | Plasmids<br>General<br>purpose<br>vectors                                                       | pNTPS138                                                                                                                                                                                                                                                                                                                                                                                           | Suicide vector, <i>oriT</i> , <i>sacB</i>                                                                                                                   | Km                                                                                                                                                                 | D. Alley                            |                               |
|                               |                                                                                                 | pMR10                                                                                                                                                                                                                                                                                                                                                                                              | Broad host-range cloning vector, low<br>copy number                                                                                                         | Km                                                                                                                                                                 | (Roberts, <i>et al.</i> , 1996)     |                               |
|                               |                                                                                                 | pSRKKm                                                                                                                                                                                                                                                                                                                                                                                             | pBBR1MCS-2-derived broad-host-range<br>expression vector containing <i>lac</i><br>promoter and <i>lac</i> <sup>f</sup> , <i>lacZ</i> <sup>+</sup>           | Km                                                                                                                                                                 | (Khan, <i>et al.</i> , 2008)        |                               |
|                               |                                                                                                 | pSRKGm                                                                                                                                                                                                                                                                                                                                                                                             | pBBR1MCS-5-derived broad-host-range<br>expression vector containing <i>lac</i><br>promoter and <i>lac</i> <sup>f</sup> , <i>lacZ</i> <sup>+</sup>           | Gm                                                                                                                                                                 | (Khan, <i>et al.</i> , 2008)        |                               |
|                               | Deletion<br>plasmids                                                                            | p $\Delta$ <i>divJ</i>                                                                                                                                                                                                                                                                                                                                                                             | pNPTS138-Tc deletion cassette for <i>divJ</i>                                                                                                               | Km, Tc                                                                                                                                                             | This work                           |                               |
|                               |                                                                                                 | p $\Delta$ <i>divJ</i> markerless<br>p $\Delta$ <i>pleC</i>                                                                                                                                                                                                                                                                                                                                        | pNPTS138 deletion cassette for <i>divJ</i><br>pNPTS138-Tc deletion cassette for <i>pleC</i>                                                                 | Km<br>Km, Tc                                                                                                                                                       | This work<br>This work              |                               |
|                               |                                                                                                 | p $\Delta$ <i>divK</i><br>pSRKKm <i>ctrA</i>                                                                                                                                                                                                                                                                                                                                                       | pNPTS138-Tc deletion cassette for <i>divK</i><br>pSRKKm containing <i>ctrA</i> inserted                                                                     | Km, Tc<br>Km                                                                                                                                                       | This work<br>This work              |                               |
|                               | Overexpression                                                                                  |                                                                                                                                                                                                                                                                                                                                                                                                    |                                                                                                                                                             |                                                                                                                                                                    |                                     |                               |



|                     |                                 |                                                                                                                                    |    |                                      |
|---------------------|---------------------------------|------------------------------------------------------------------------------------------------------------------------------------|----|--------------------------------------|
| plasmids            | pSRKKm <i>divJ</i>              | between NdeI and KpnI sites<br>pSRKKm containing <i>divJ</i> inserted<br>between NdeI and XhoI sites                               | Km | This work                            |
|                     | pSRKGm <i>divJ</i>              | pSRKGm containing <i>divJ</i> inserted<br>between NdeI and XhoI sites                                                              | Gm | This work                            |
|                     | pSRKKm <i>pleC</i>              | pSRKKm containing <i>pleC</i> inserted<br>between NdeI and KpnI sites                                                              |    |                                      |
|                     | pSRKKm <i>divK</i>              | pSRKKm containing <i>divK</i> inserted<br>between NdeI and KpnI sites                                                              | Km | This work                            |
|                     | pSRKKm <i>divK</i> D53A         | pSRKKm containing <i>divK</i> D53A inserted<br>between NdeI and KpnI sites                                                         | Km | This work                            |
|                     | pSRKKm <i>divJ</i> H249A        | pSRKKm containing <i>divJ</i> H249A inserted<br>between NdeI and XhoI sites                                                        | Km | This work                            |
| GFP-tagging         | pGEE                            | pG18mob derivative; promoterless <i>eGFP</i><br>gene, it integrates between the <i>exoP</i><br>terminator and the <i>thiD</i> gene | Gm | Elizaveta Krol<br>(unpublished)      |
|                     | pSRmig                          | pSRPP18 derivative; promoterless <i>lacZ</i><br>replaced with promoterless <i>egfp</i>                                             | Km | (McIntosh <i>et al.</i> , 2009)      |
|                     | pSRmigPsinR171mutcc             | pSRmig derivative; containing a mutated<br>constitutive sinR promoter                                                              | Km | Matthew<br>McIntosh<br>(unpublished) |
| Reporter<br>plasmid | pGECE                           | integrative vector overexpressing EGFP                                                                                             | Gm | This work                            |
|                     | pJS70                           | <i>pilA</i> promoter- <i>lacZ</i> fusion in pRKlac290                                                                              | Tc | (Skerker &<br>Shapiro 2000)          |
|                     | pRKlac290-P <sub>Smc00360</sub> | <i>SMc0360</i> promoter- <i>lacZ</i> fusion in<br>pRKlac290                                                                        | Tc | This work                            |
|                     | pRKlac290-P <sub>Smc00949</sub> | <i>SMc0949</i> promoter- <i>lacZ</i> fusion in<br>pRKlac290                                                                        | Tc | This work                            |

**Table S5**

| <b>Primer name</b>              | <b>Sequence</b>                           |
|---------------------------------|-------------------------------------------|
| pSmc00059_P1                    | AACAGGCAATCGCGTTTCCCC                     |
| pSmc00059_P2                    | CGATATCAAGCTTATCGATACCGTGTCCATCTGCCAGCCAT |
| pSmc00059_P3                    | AACTTCGAATTCCTGCAGCCGGGGGACATGGCGCCGCG    |
| pSmc00059_P4                    | AGTGGTGCGCAACTGCTC                        |
| pSmc00059_P0                    | GGCATATGGCTGGCAGATGGACATC                 |
| pSmc00059_P6                    | CTCGAGCTGAAGACGACGGCAAAGAT                |
| pSmc00059_P2 <i>ecoRI</i>       | GAATTCTGTCCATCTGCCAGCCAT                  |
| pSmc00059_P3 <i>ecoRI</i>       | GAATTCGGGGGACATGGCGCCGCG                  |
| pSmc02369_P1alt                 | GAAGCTTGGATGCCATTTACGCCGG                 |
| pSmc02369_P2alt                 | GGAATTCATCCCATCTTCAGCGGTTTCC              |
| pSmc02369_P3 fw                 | GGAATTCGGCACCATCATATCGGTCAAG              |
| pSmc02369_P4 rv                 | GGTCGACACCGACCTTGCCGATCTGA                |
| pSmc00059_P1tris                | GCGCATCGTTATCTCACCTT                      |
| pSmc00059_P4tris                | CGCATGCAAAGCTGATACAC                      |
| pSmc02369_Pext_fw               | GTTCCGATCGCAAAGTGATGT                     |
| pSmc02369_Pext_rv               | ACTACGAGGAGGTGCTGGAC                      |
| pSmc02369_Pint_fw               | AAGATCCATTCGGCAGAGAA                      |
| M13 Fw                          | GTA AACGACGGCCAG                          |
| M13 Rv                          | CAGGAAACAGCTATGAC                         |
| psinRmut_fwd                    | GTGCATATCGCGAGGTACCA                      |
| psinRmut_rev                    | AGGCTCTAGACATACCTCCTTAGGATCTGAGGC         |
| pSmc00059_H249A_sense           | TTCCTTGCCGCCGTGACGCGCCGAAGTGCACGACCCG     |
| pSmc00059_H249A_antisense       | CGGCGTGCAGTTCGGCGCTGACGGCGGCAAGGAA        |
| pSmc01371_D53A_sense            | CCGACCTGATTCTGATGGCCATCAGTTGCCGGAGG       |
| pSmc01371_D53A_antisense        | CCTCCGGCAACTGGATGGCCATCAGAATCAGGTCCG      |
| pSmc00059_CACC_HK_fw            | CACCGAGTCGGCCAACGATGCCA                   |
| PSMC01371_CACC_fw               | CACCGTGCCCAAACAGGTAATG                    |
| pSmc01371_P6                    | GGTACCGCCGTAAGCACGTCGAAATA                |
| pSMc00654- <i>NdeI</i> -ctrA-fw | GGCATATGCGGGTTCTACTGATCGAAG               |
| pSMc00654- <i>KpnI</i> -ctrA-rv | GGGGTACCATGTCGCCTACGGGAATGCC              |
| pSmc01371 P1                    | GAAGCTTTCGAGGGCTTTGAACATAGG               |
| pSmc01371 P2                    | GGAATTCCTCAGCTCGTTATCCTCAACAA             |
| pSmc01371 P3                    | GGAATTCAAAACATATCTGGGCGATGC               |
| pSmc01371P4                     | GGTCGACATCAGCAGCTTCAGGTGGTT               |
| pSmc01371 P0                    | CATATGCCCAAACAGGTAATGATTG                 |
| pSmc01371_P1ext                 | GAAGCTTACGCGCACATATTTCTCCAT               |
| pSmc01371_P4ext                 | GGTCGACCGTGAGTGTCGTTACACG                 |
| pSmc0360 (prom) <i>XbaI</i>     | TCTAGACAGATCCCCTGCAACGCGCCCG              |
| pSmc0360 (prom) <i>BamHI</i>    | GGATCCGCTCGCCGAACGGGGTTATTTCCG            |
| pSmc0949 (prom) <i>XbaI</i>     | TCTAGACGCAACACATCCTTTTCAGACA              |
| pSmc0949 (prom) <i>BamHI</i>    | GGATCCTCCTGCTCGCCTATTCGGCCCGCAA           |

Figure S1

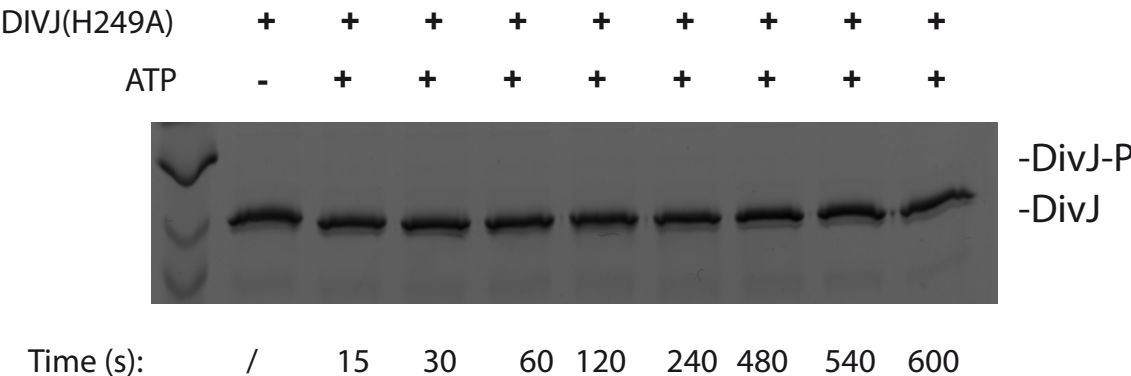

Figure S2

|                           | 'Helix 1' (Cc: 332-351) | 'Helix 2' (Cc: 369-395)      |
|---------------------------|-------------------------|------------------------------|
| <b>DivJ</b>               |                         |                              |
| <i>C. crescentus</i>      | FLANMSHELRTPLNAIMGFS    | YAELEHESGGHLLDLINDVLDMSKIEA  |
| <i>A. tumefaciens</i>     | FLAAVSHELRTPLNAVLGFS    | YVGLIRQSGAHLLSVVNTMLDMSKLEA  |
| <i>B. japonicum</i>       | FLATMSHELRTPLNAIIGFS    | YAQVINDSGQHLLSVVNGILDMSKMES  |
| <i>B. melitensis</i>      | LLATVSHELRTPLNSIIGFS    | YAGLIHQSGHYLLELVNAVLDNSRLET  |
| <i>M. loti</i>            | FLAVVSHELRTPLNAIIGFS    | YVTLVRDSGQHLLAVVTSILDVSRIES  |
| <i>M. maris</i>           | FLASVSHELRTPLNAIIGFS    | YADLIHESGQHLMELIGDVLDMKIEA   |
| <i>N. winogradskyi</i>    | FLATMSHELRTPLNAIIGFS    | YAQLINDSGQHLLSVVNSILDMSKMES  |
| <i>O. anthropi</i>        | LLAAVSHELRTPLNSIIGFS    | YAGLIHQSGHYLLELVNAVLDNSRLET  |
| <i>P. lavamentivorans</i> | FLANMSHELRTPLNAIIGFS    | YAQLINESGALLLDLISDILDMSKIEA  |
| <i>R. etli</i>            | FLAAVSHELRTPLNAIIGFS    | YVSLVRESGAHLLSVVNTMLDMSKIEA  |
| <i>R. palustris</i>       | FLATVSHELRTPLNAIIGFS    | YAQLINDSGQHLLSVVNGILDMSKMES  |
| <i>S. meliloti</i>        | FLAAVSHELRTPLNAIIGFS    | YVSLIHQSGTHLLSVVNTMLDMSKIEA  |
| <i>X. autotrophicus</i>   | FLAAMSHELRTPLNAIIGFS    | YARIHESGQHLLGLVNDILDLSRVEA   |
| <b>PleC</b>               |                         |                              |
| <i>C. crescentus</i>      | FLANMSHELRTPLNAINGFS    | YSQDIHSSGQHLLALINDILDMSKIEA  |
| <i>A. tumefaciens</i>     | FLANMSHELRTPLNAIIGFS    | YARDIHDSGKHLNVINDILDMSKIEA   |
| <i>B. bacilliformis</i>   | FLANISHELRTPLNAIIGFS    | YMRDIHNSGTHLLTLINDILDMSKIEA  |
| <i>B. japonicum</i>       | FLANMSHELRTPLNAIIGFS    | YCQDILTSGHYLLLEVINDILDMSKIEA |
| <i>B. melitensis</i>      | FLANMSHELRTPLNAIIGFS    | YINDIHTSGNFFLLNVINDILDMSKIEA |
| <i>H. neptunium</i>       | FLANMSHELRTPLNAVIGFS    | YAKDILMSGQHLLDMINDILDMAKIEA  |
| <i>M. loti</i>            | FLANMSHELRTPLNAIIGFS    | YATDINSSGKYLLGVINDILDMSKIEA  |
| <i>M. magneticum</i>      | FLANMSHELRTPLNAIIGFS    | YIGWIWDSGHLLRRIINDILDLAKEV   |
| <i>M. maris</i>           | FLANMSHELRTPLNAINGFS    | YMKDILSSGRHLLLELINDILDMSKIEA |
| <i>N. winogradskyi</i>    | FLANMSHELRTPLNAIIGFS    | YCRDILTSGQYLLLEVINDVLDMSKIEA |
| <i>O. anthropi</i>        | FLANMSHELRTPLNAIIGFS    | YINDIHTSGNFFLLNVINDILDMSKIEA |
| <i>P. lavamentivorans</i> | FLANMSHELRTPLNAIIGFS    | YAGDIHASGTHLLELINDILDMSKIEA  |
| <i>R. etli</i>            | FLANMSHELRTPLNAIIGFS    | YARDIHDSGKHLNVINDILDMSKIEA   |
| <i>R. palustris</i>       | FLANMSHELRTPLNAIIGFS    | YCHDILTSGHYLLEVINDILDMSKIEA  |
| <i>R. rubrum</i>          | FLTNMSHELRTPLNAIIGFS    | YAASIRDSGRHLLDVINDILDVSRIEA  |
| <i>S. meliloti</i>        | FLANMSHELRTPLNAIIGFS    | YSRDI FESGKHLNVINDILDMSKIEA  |
| <i>S. wittichii</i>       | FLANMSHELRTPLNSLLILLS   | YANTI ESSGNDLLTLINDILDLSKIEA |
| <i>X. autotrophicus</i>   | FLANMSHELRTPLNAIIGFS    | YCTDIKGSPTYLLDVINDILDMSKIEA  |

| DivJ      | PleC      | Organism                                  | Abbreviation              |
|-----------|-----------|-------------------------------------------|---------------------------|
| 13476354  | 13476392  | <i>Mesorhizobium loti</i> MAFF303099      | <i>M. loti</i>            |
| 15888259  | 15888325  | <i>Agrobacterium tumefaciens</i> str. C58 | <i>A. tumefaciens</i>     |
| 15964755  | 15964778  | <i>Sinorhizobium meliloti</i> 1021        | <i>S. meliloti</i>        |
| 16125315  | 16126721  | <i>Caulobacter crescentus</i> CB15        | <i>C. crescentus</i>      |
| 17987640  | 17987608  | <i>Brucella melitensis</i> 16M            | <i>B. melitensis</i>      |
| 27378182  | 27378251  | <i>Bradyrhizobium japonicum</i> USDA 110  | <i>B. japonicum</i>       |
| 75676406  | 75675393  | <i>Nitrobacter winogradskyi</i> Nb-255    | <i>N. winogradskyi</i>    |
|           | 83309766  | <i>Magnetospirillum magneticum</i> AMB-1  | <i>M. magneticum</i>      |
|           | 83594543  | <i>Rhodospirillum rubrum</i> ATCC 11170   | <i>R. rubrum</i>          |
| 86356892  | 86356937  | <i>Rhizobium etli</i> CFN 42              | <i>R. etli</i>            |
| 90423287  | 90423355  | <i>Rhodopseudomonas palustris</i> BisB18  | <i>R. palustris</i>       |
| 114569450 | 114569501 | <i>Maricaulis maris</i> MCS10             | <i>M. maris</i>           |
|           | 114797754 | <i>Hyphomonas neptunium</i> ATCC 15444    | <i>H. neptunium</i>       |
|           | 121602141 | <i>Bartonella bacilliformis</i> KC583     | <i>B. bacilliformis</i>   |
|           | 148550789 | <i>Sphingomonas wittichii</i> RW1         | <i>S. wittichii</i>       |
| 153010009 | 153009989 | <i>Ochrobactrum anthropi</i> ATCC 49188   | <i>O. anthropi</i>        |
| 154245353 | 154245571 | <i>Xanthobacter autotrophicus</i> Py2     | <i>X. autotrophicus</i>   |
| 154251104 | 154251412 | <i>Parvibaculum lavamentivorans</i> DS-1  | <i>P. lavamentivorans</i> |

Figure S3

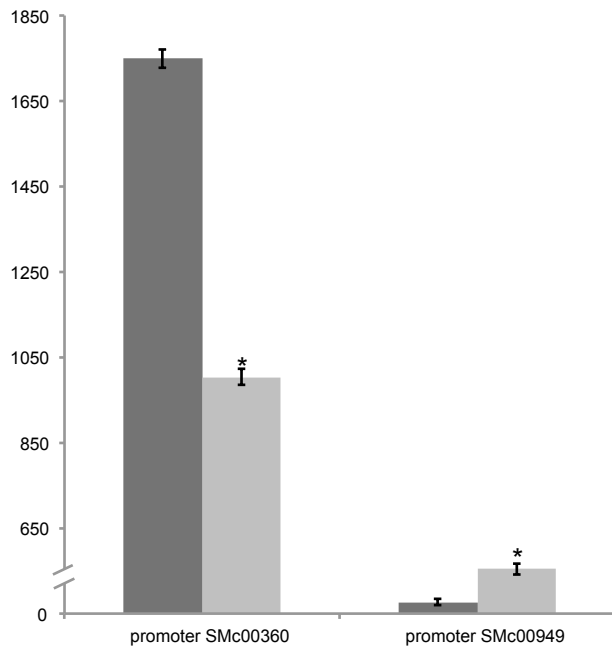

Figure S4

**A**

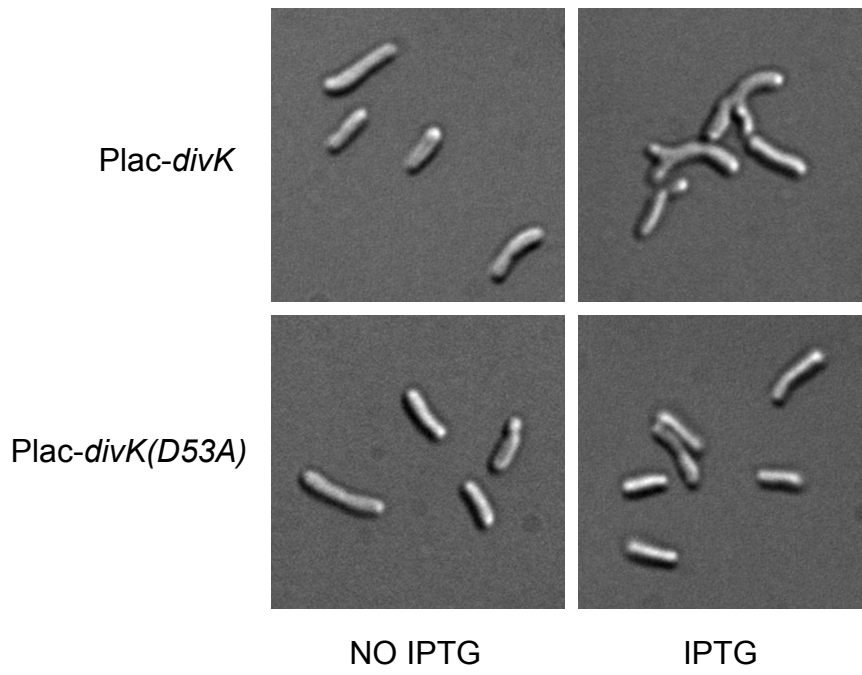

**B**

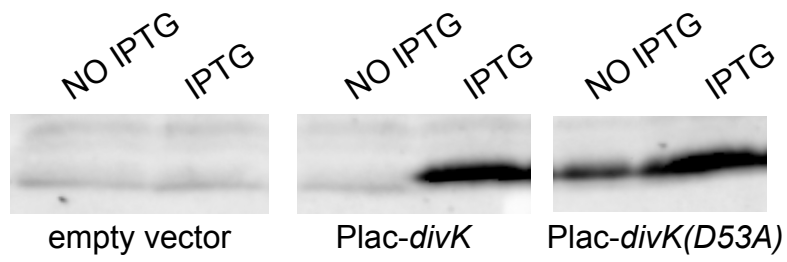

Figure S5

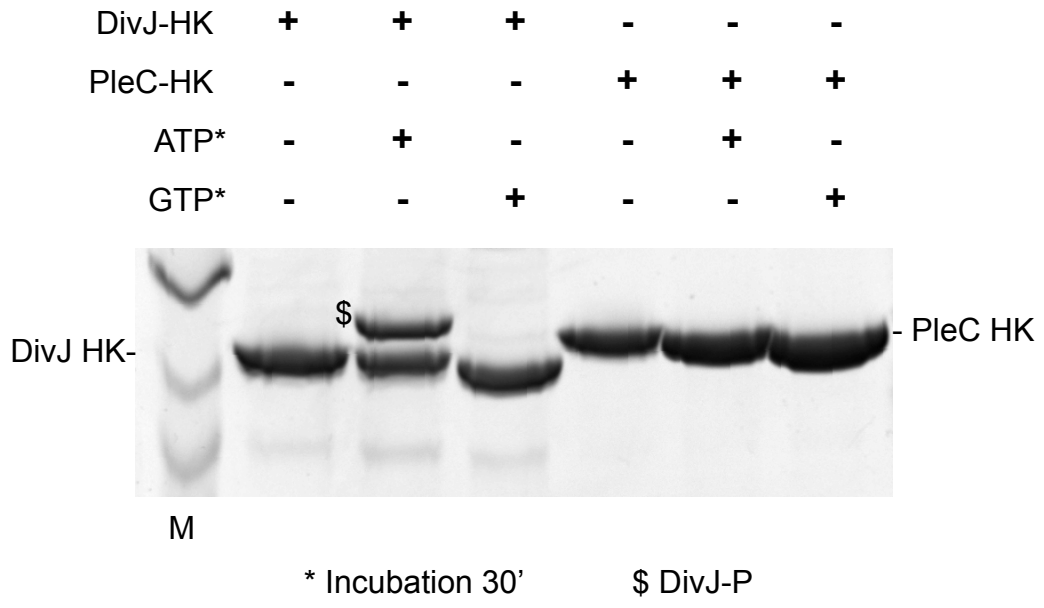

Figure S6

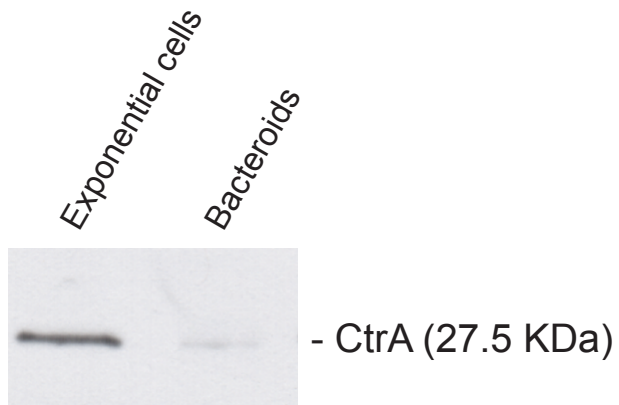



Figure S7

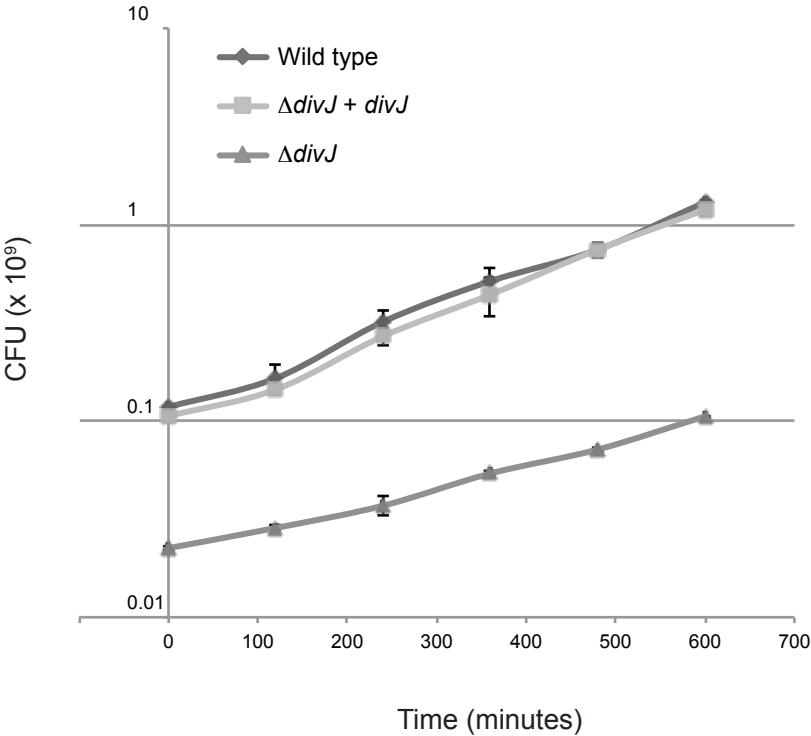

Supplement: NIHMS511669-supplement-Supp_Fig_S1-S7___Table_S1-S5.pdf [file NIHMS511669-supplement-Supp_Fig_S1-S7___Table_S1-S5.pdf]
